# Supplementary material
Source: PubMed Central journal article supplement (PMC4972271)
Supplement: supp_pp.16.00399_Supp._Info_updated00399.pdf [file supp_pp.16.00399_Supp._Info_updated00399.pdf]

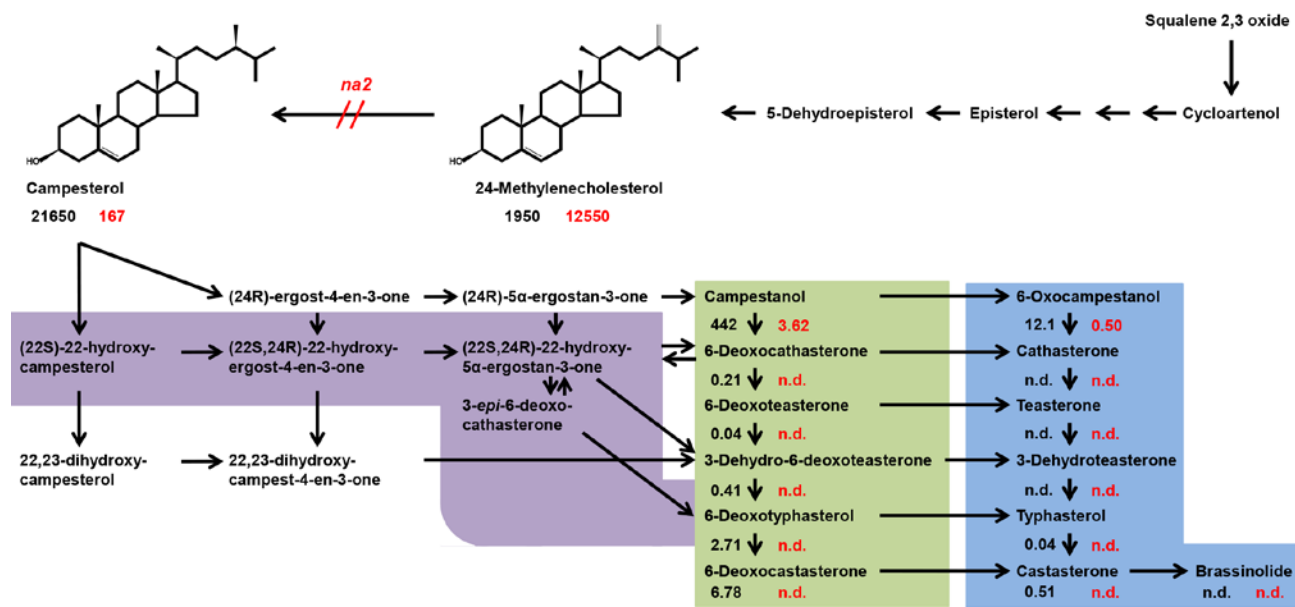

**Figure S1. The proposed brassinosteroid pathway and measured intermediates from *na2-1* and wild-type plants.**

Brassinosteroid intermediates in ng/g fresh weight from 28d old wild-type and *na2-1* plants are presented in black and red text, respectively. The early C-22 oxidation pathway is highlighted in purple, the late C-6 oxidation pathway is highlighted in green, and the early C-6 oxidation pathway is highlighted in blue. Data are means of two independent experiments of 10 plants each. n.d., not detected. Proposed brassinosteroid pathway modified from Nakamura et al., 2009; Ohnishi et al., 2012; Verhoef et al., 2013; Chung and Choe, 2013.

Chung Y, Choe S (2013) The regulation of brassinosteroid biosynthesis in *Arabidopsis*. *Crit Rev Plant Sci* 32: 396–410

Nakamura A, Fujioka S, Takatsuto S, Tsujimoto M, Kitano H, Yoshida S, Asami T, Nakano T (2009) Involvement of C-22-hydroxylated brassinosteroids in auxin-induced lamina joint bending in rice. *Plant Cell Physiol* 50: 1627–1635

Ohnishi T, Godza B, Watanabe B, Fujioka S, Hategan L, Ide K, Shibata K, Yokota T, Szekeres M, Mizutani M (2012) CYP90A1/CPD, a brassinosteroid biosynthetic cytochrome P450 of *Arabidopsis*, catalyzes C-3 oxidation. *J Biol Chem* 287: 31551–31560

Verhoef N, Yokota T, Shibata K, De Boer GJ, Gerats T, Vandenbussche M, Koes R, Souer E (2013) Brassinosteroid biosynthesis and signalling in *Petunia hybrida*. *J Exp Bot* 64: 2435–2448

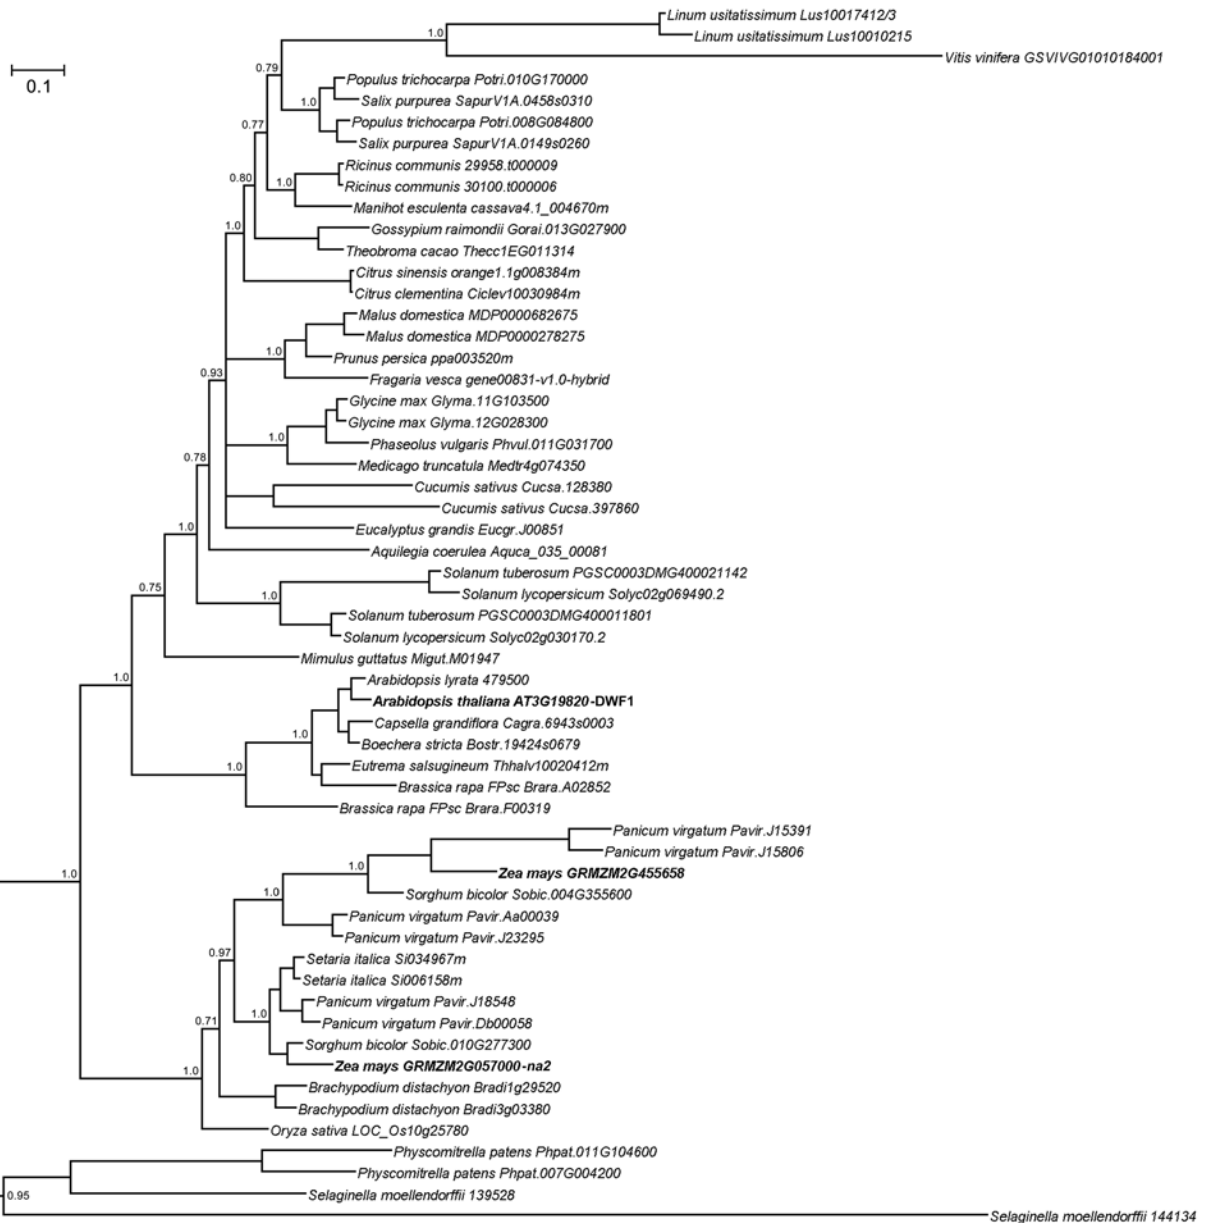

**Figure S2. Phylogenetic tree of presumed  $\Delta^{24}$ -sterol reductases from 36 taxa.**

Presented is a maximum likelihood, Bayesian MCMC, phylogenetic consensus tree of conceptually-translated protein sequences derived from the genes encoding likely  $\Delta^{24}$ -sterol reductases identified within plant whole genome assemblies in Phytozome. All genes annotated as similar to GRMZM2G057000 with an alignment score greater than 1500 and sequence similarity greater than 50% were included in the analysis. Scale bar indicates the number of amino acid changes per orthologous site. Posterior probabilities

for selected nodes are indicated. The Arabidopsis *DWF1*, maize *na2*, and the gene encoded by the maize paralog of *na2* are indicated by bold text.



**Figure S3. Multiple sequence alignment of *Zea mays* NA2 protein sequence with orthologous sequences.**

Red amino acids indicate the SNP induced amino acid changes and are denoted above the sequence in *na2-1*, Q to \*; *na2-2*, G to R; *na2-3*, E to K; and *na2-4*, G to \*. Black background indicates identity conservation of  $\geq 90\%$ , grey indicates conservation of  $\geq 50\%$ , and white indicates conservation of  $\leq 50\%$ . Dashed lines indicate gaps in the alignment. *Zm*, *Zea mays* (GRMZM2G057000); *Zm\**, *Zea mays* (GRMZM2G455658); *Sb*, *Sorghum bicolor* (Sobic.010G277300); *Sb\**, *Sorghum bicolor* (Sobic.004G355600); *Si*, *Setaria italic* (Si006158m); *Si\**, *Setaria italic* (Si034967m); *Os*, *Oryza sativa* (LOC\_Os10g25780); *At*, *Arabidopsis thaliana* (AT3G19820); *Gm*, *Glycine max* (Glyma12g03210); *Gm\**, *Glycine max* (Glyma11g103500); *Me*, *Manihot esculenta* (cassava4.1\_004670m.g); *Sm*, *Selaginella moellendorffii* (139528); *Sm\**, *Selaginella moellendorffii* (144134); *Pp*, *Physcomitrella patens* (Phpat.007G004200); *Pp\**, *Physcomitrella patens* (Phpat.011G104600).

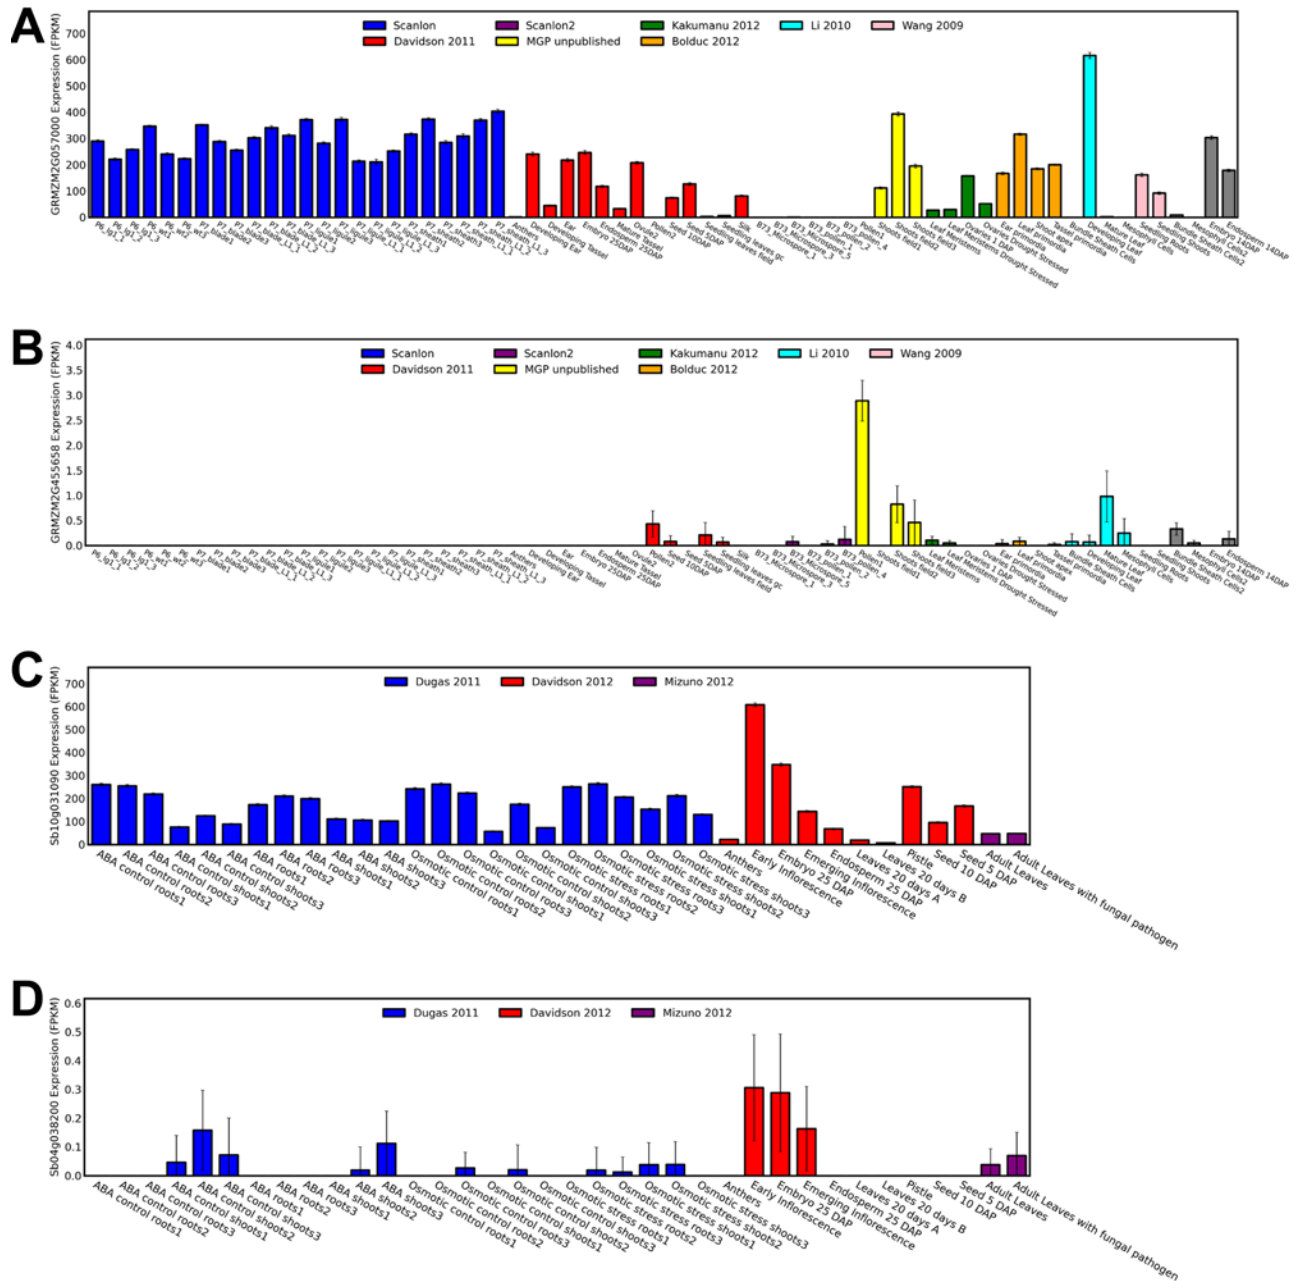

**Figure S4. RNA expression levels of maize or sorghum genes from qTeller dataset.**

RNA expression FPKM values from previously published RNA-seq experiments for (A) GRMZM2G057000 (*na2*), (B) GRMZM2G455658, (C) Sb10g031090 (Sobic.010G277300), and (D) Sb04g038200 (Sobic.004G355600). Data are taken from the from qTeller database. Figures can be regenerated using the following links:

GRMZM2G057000:

[http://qteller.com/qteller3/bar\\_chart.php?name=GRMZM2G057000&info=](http://qteller.com/qteller3/bar_chart.php?name=GRMZM2G057000&info=)

GRMZM2G455658:

[http://qteller.com/qteller3/bar\\_chart.php?name=GRMZM2G455658&info=](http://qteller.com/qteller3/bar_chart.php?name=GRMZM2G455658&info=)

Sb10g031090 (Sobic.010G277300):

[http://qteller.com/sorghum/bar\\_chart.php?name=Sb10g031090&info=](http://qteller.com/sorghum/bar_chart.php?name=Sb10g031090&info=)

Sb04g038200 (Sobic.004G355600):

[http://qteller.com/sorghum/bar\\_chart.php?name=Sb04g038200&info=](http://qteller.com/sorghum/bar_chart.php?name=Sb04g038200&info=)

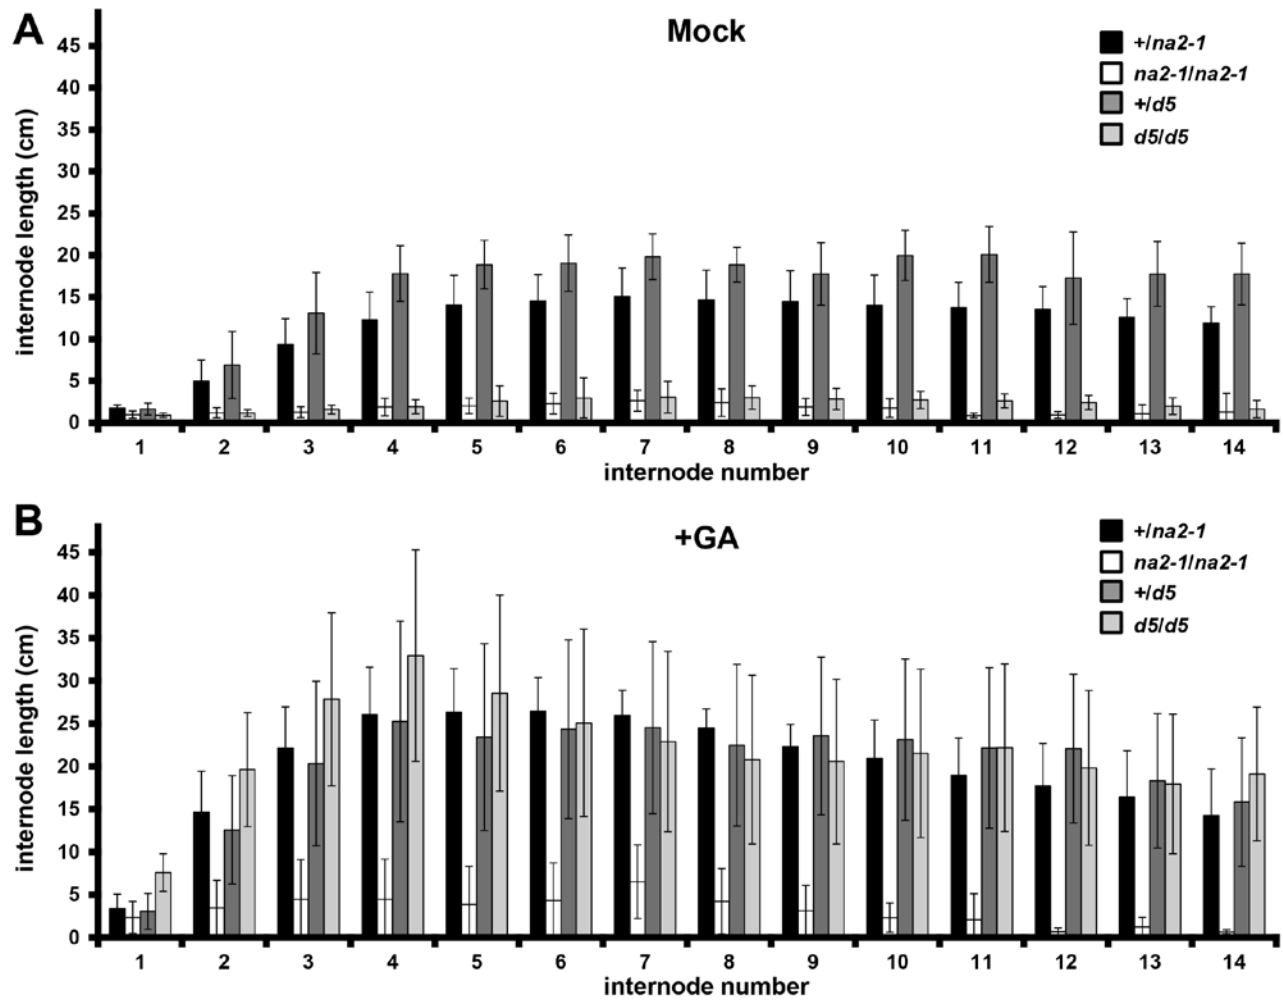

**Figure S5. Internode lengths of *na2-1*, *d5*, and wild-type siblings with and without GA<sub>3</sub> application.**

(A) Internode lengths in centimeters measured at maturity under mock conditions. (B) Internode lengths in centimeters measured at maturity treated with GA<sub>3</sub>. 1 mL GA<sub>3</sub> application was applied to the leaf whorl at a concentration of 866 μM every third day, starting 25 d after sowing. (A-B) Errors bars represent ± standard deviation.



**Table SI. Segregation ratios of crosses.**

| Site   | Ear #  | Mother            | Father                   | WT | mut | TOT | $\chi^2$ p-val |
|--------|--------|-------------------|--------------------------|----|-----|-----|----------------|
| WL2011 | CN833  | <i>+/na1-1</i>    | <i>na2-1/na2-1</i>       | 31 | 0   | 31  | 2.58E-08       |
| WL2011 | CN1393 | <i>+/na2-3</i>    | <i>na1-1/na1-1</i>       | 15 | 0   | 15  | 0.0001         |
| WL2011 | CN1394 | <i>+/na2-3</i>    | <i>na1-1/na1-1</i>       | 18 | 0   | 18  | 2.21E-05       |
| WL2011 | CN1395 | <i>+/na2-3</i>    | <i>na1-1/na1-1</i>       | 17 | 0   | 17  | 3.74E-05       |
| WL2011 | CN841  | <i>+/na2-7</i>    | <i>na1-1/na1-1</i>       | 32 | 0   | 32  | 1.54E-08       |
| GH2011 | MA45   | <i>+/na2-506D</i> | <i>na2-1/na2-1</i>       | 40 | 31  | 71  | 0.2854         |
| GH2011 | MA46   | <i>+/na2-506D</i> | <i>na2-1/na2-1</i>       | 33 | 28  | 61  | 0.5221         |
| WL2011 | CN857  | <i>+/na2-1</i>    | <i>na2-518C/na2-518C</i> | 16 | 15  | 31  | 0.8575         |
| WL2011 | CN828  | <i>+/na2-7</i>    | <i>na2-506D/na2-506D</i> | 18 | 14  | 32  | 0.4795         |
| WL2011 | CN939  | <i>+/na2-7</i>    | <i>na2-518C/na2-518C</i> | 9  | 8   | 17  | 0.8084         |
| WL2011 | CN745  | <i>+/na2-7</i>    | <i>na2-1/na2-1</i>       | 17 | 15  | 32  | 0.7327         |
| WL2010 | CN560  | <i>+/na2-7</i>    | <i>na2-1/na2-1</i>       | 13 | 2   | 15  | 0.0045         |
| WL2010 | CN561  | <i>+/na2-7</i>    | <i>na2-1/na2-1</i>       | 6  | 8   | 14  | 0.5930         |
| WL2010 | CN578  | <i>+/na2-7</i>    | <i>na2-1/na2-1</i>       | 8  | 9   | 17  | 0.8084         |
| GH2010 | CN673  | <i>+/na2-2</i>    | <i>na2-7/na2-7</i>       | 19 | 16  | 35  | 0.6121         |
| GH2010 | CN674  | <i>+/na2-2</i>    | <i>na2-7/na2-7</i>       | 16 | 15  | 31  | 0.8575         |
| GH2010 | CN646  | <i>+/na2-3</i>    | <i>na2-7/na2-7</i>       | 15 | 13  | 28  | 0.7055         |
| GH2010 | CN648  | <i>+/na2-3</i>    | <i>na2-7/na2-7</i>       | 19 | 15  | 34  | 0.4927         |
| GH2011 | MA37   | <i>+/na2-4</i>    | <i>na2-506D/na2-506D</i> | 4  | 2   | 6   | 0.4142         |
| GH2011 | MA38   | <i>+/na2-4</i>    | <i>na2-506D/na2-506D</i> | 14 | 11  | 25  | 0.5485         |
| GH2011 | MA160  | <i>+/na2-4</i>    | <i>na2-506D/na2-506D</i> | 28 | 26  | 54  | 0.7855         |
| WL2011 | CN1384 | <i>+/na2-1</i>    | <i>na2-6/na2-6</i>       | 13 | 11  | 24  | 0.6831         |

**Table SII. Stomatal indices and densities of *na2-1*, *na2-2*, and wild-type plants.**

|                                 | <i>+/na2-1</i> | <i>na2-1/na2-1</i> | <i>+/na2-2</i> | <i>na2-2/na2-2</i> |
|---------------------------------|----------------|--------------------|----------------|--------------------|
| SI abaxial <sup>a</sup>         | 15.7 ±1.2      | 16.9 ±1.7          | 17.4 ±1.6      | 18.7 ±2.2          |
| SD abaxial <sup>b</sup>         | 158.5 ±29.4    | 166.2 ±15.5        | 181.4 ±24.7    | 192.8 ±20.2        |
| SI adaxial <sup>a</sup>         | 10.5 ±0.7      | 12.1 ±1.7          | 12.1 ±2.3      | 11.8 ±1.1          |
| SD adaxial <sup>b</sup>         | 110.4 ±14.2    | 121.8 ±17.4        | 115.4 ±20.7    | 109.1 ±10.4        |
| RS adaxial/abaxial <sup>c</sup> | 0.696          | 0.733              | 0.636          | 0.566              |

<sup>a</sup>SI, stomatal index, <sup>b</sup>SD, stomatal density, and <sup>c</sup>RS, ratio of stomata, were measured at the widest portion of leaf 5 of 30 d old plants.

Data is presented as means with standard deviation of 6 biological replicates.

**Table SIII. Source of maize genetic stocks.**

| Allele          | Source                           | Stock Name             | Genetic Background |
|-----------------|----------------------------------|------------------------|--------------------|
| <i>na2-1</i>    | Maize COOP                       | 4407D d*-N2374         | Unknown            |
| <i>na2-2</i>    | Maize TILLING                    | PB03NM417              | B73                |
| <i>na2-3</i>    | Maize TILLING                    | 04INW22CW04351         | W22                |
| <i>na2-4</i>    | Maize TILLING                    | 04IAB73PS020G1         | B73                |
| <i>na2-5</i>    | Identified in <i>Mu</i> -tagging | <i>na2-Mu13 (Mu#8)</i> | Unknown            |
| <i>na2-6</i>    | Maize TILLING                    | 04CAB73SH0365          | B73                |
| <i>na2-7</i>    | Maize COOP                       | 4405B d*-N1074C        | Unknown            |
| <i>na2-506D</i> | Maize COOP                       | 506D                   | Unknown            |
| <i>na2-518C</i> | Maize COOP                       | 518C                   | Hi27               |
| <i>na1-1</i>    | Maize COOP                       | 310G                   | Unknown            |
| <i>d5</i>       | Carolina Bio Sup Co              | 177110                 | Unknown            |
| <i>d1</i>       | Maize COOP                       | 302A d1-6016           | Unknown            |

**Table SIV. Primers used in this study.**

| Primer Name     | Primer sequence- 5' to 3'    |
|-----------------|------------------------------|
| <b>Genomic</b>  |                              |
| ZmDWF1_-988FOR  | GTGTCAACTGGTAGGATAATAGCCCA   |
| ZmDWF1_-440FOR  | GTGTGCATATTCTCAAGGCTGTGG     |
| ZmDWF1_-163FOR  | CAGATAACAATGTGCTTCCTTCAGC    |
| ZmDWF1_-163REV  | GCTGAAGGAAGCACATTGTTATCTG    |
| ZmDWF1_-21FOR   | AACGACCACGAGCTTTTAGGC        |
| ZmDWF1_+144FOR  | CTTCAACATCTTCCTGGGCGAC       |
| ZmDWF1_+144REV  | GTCGCCCAGGAAGATGTTGAAG       |
| ZmDWF1_+675FOR  | CACTGGGGTTCCTTGTCTCTGCG      |
| ZmDWF1_+675REV  | CGCAGAGACAAGGAACCCAGTG       |
| ZmDWF1_+1168FOR | GCTATCAGGAACTACTACCACGACAACC |
| ZmDWF1_+1168REV | GGTTGTCGTGGTAGTAGTTCCTGATAGC |
| ZmDWF1_+1243FOR | TACAATGGCTGGCTGGTGCT         |
| ZmDWF1_+1243REV | AGCACCAGCCAGCCATTGTA         |
| ZmDWF1_+1850REV | TGGATGTAGTGTGTGTCTGTCTCAAG   |
| ZmDWF1_na2-1DC  | GTAGTACACGCCACGTCCGTGAACAGCT |
| MuExt22D        | CCAACGCCAWSGCCTCYATTTTC      |
| MuInt19         | GCCTCYATTTTCGTCTGAATC        |
| <b>qRT-PCR</b>  |                              |
| ZmDWF1qRT_FOR2  | GAGCAGTGGCTGATCGAGAAC        |
| ZmDWF1qRT_REV2  | AACATGCGCCAGAAGTCCTT         |
| ZmMOLqRT_FOR2   | CTGTGTCCTCCGTGCTCCAT         |
| ZmMOLqRT_REV2   | AGGACTCCCGCATCTCCATA         |

**Table SV. Two independent experiments showing BR intermediates in wild-type and *na2-1* plants.**

| Compound <sup>a</sup>       | Exp. 1            |                    | Exp. 2            |                    |
|-----------------------------|-------------------|--------------------|-------------------|--------------------|
|                             | +/ <i>na2-1</i>   | <i>na2-1/na2-1</i> | +/ <i>na2-1</i>   | <i>na2-1/na2-1</i> |
| 24-methylenecholesterol     | 2040              | 14000              | 1860              | 11100              |
| campesterol                 | 25400             | 190                | 17900             | 143                |
| campestanol                 | 555               | 6.10               | 329               | 1.13               |
| 6-oxocampestanol            | 12.5              | 0.35               | 11.6              | 0.64               |
| 6-deoxocathasterone         | 0.19              | n.d. <sup>b</sup>  | 0.23              | n.d. <sup>b</sup>  |
| 6-deoxoteasterone           | 0.02              | n.d. <sup>b</sup>  | 0.05              | n.d. <sup>b</sup>  |
| 3-dehydro-6-deoxoteasterone | 0.55              | n.d. <sup>b</sup>  | 0.27              | n.d. <sup>b</sup>  |
| 6-deoxotyphasterol          | 3.09              | n.d. <sup>b</sup>  | 2.32              | n.d. <sup>b</sup>  |
| 6-deoxocastasterone         | 7.71              | n.d. <sup>b</sup>  | 5.84              | n.d. <sup>b</sup>  |
| cathasterone                | n.d. <sup>b</sup> | n.d. <sup>b</sup>  | n.d. <sup>b</sup> | n.d. <sup>b</sup>  |
| teasterone                  | n.d. <sup>b</sup> | n.d. <sup>b</sup>  | n.d. <sup>b</sup> | n.d. <sup>b</sup>  |
| 3-dehydroteasterone         | n.d. <sup>b</sup> | n.d. <sup>b</sup>  | n.d. <sup>b</sup> | n.d. <sup>b</sup>  |
| typhasterol                 | 0.03              | n.d. <sup>b</sup>  | 0.04              | n.d. <sup>b</sup>  |
| castasterone                | 0.58              | n.d. <sup>b</sup>  | 0.43              | n.d. <sup>b</sup>  |
| brassinolide                | n.d. <sup>b</sup> | n.d. <sup>b</sup>  | n.d. <sup>b</sup> | n.d. <sup>b</sup>  |

<sup>a</sup> ng/g fresh weight from 28 DAG plants.

<sup>b</sup> n.d., not detected.
